# Supplementary material for: Genomic findings in patients with clinical suspicion of 22q11.2 deletion syndrome
Source: PubMed Central journal article supplement (PMC5243916; doi:10.1007/s13353-016-0366-1), 2016-09-14
Supplement: 13353_2016_366_MOESM1_ESM.pdf [file 13353_2016_366_MOESM1_ESM.pdf]

### Supplementary Data 1.

#### Incidence of clinical features typical for deletion 22q11.2 syndrome in 41 patients enrolled in the study.

F – Female, M – Male, R – Right, L – Left, B – Bilateral, nd – no data. Blank boxes indicate absence of the feature.

| Patient | Gender | Congenital heart defect  |                       |                      | Craniofacial anomalies |                             |                       |                                |                          |                  |              |                              |                       | Other anomalies                             |          |                      |                                      |               |                                       |               |
|---------|--------|--------------------------|-----------------------|----------------------|------------------------|-----------------------------|-----------------------|--------------------------------|--------------------------|------------------|--------------|------------------------------|-----------------------|---------------------------------------------|----------|----------------------|--------------------------------------|---------------|---------------------------------------|---------------|
|         |        | Heart defect, including: | * Conotruncal anomaly | * Fallot's tetralogy | Micro( retro)gnathia   | Long nose with broad bridge | Unusually shaped ears | Long slender fingers and hands | Short palpebral fissures | Facial asymmetry | Cleft palate | Velopharyngeal insufficiency | Swallowing difficulty | Learning difficulties / developmental delay | Epilepsy | Psychiatric disorder | Immunodeficiency / thymic hypoplasia | Hypocalcaemia | Renal abnormalities / Potter sequence | Short stature |
| 1       | M      | +                        |                       |                      | +                      |                             | +                     |                                | +                        |                  |              |                              | +                     | +                                           |          |                      |                                      |               | +                                     |               |
| 2       | M      | +                        |                       |                      | +                      |                             | +                     |                                |                          |                  |              | +                            | +                     | +                                           |          |                      |                                      |               |                                       |               |
| 3       | M      |                          |                       |                      | +                      |                             | +                     |                                |                          |                  |              |                              | +                     |                                             |          |                      |                                      |               |                                       |               |
| 4       | M      | +                        | +                     |                      |                        |                             |                       |                                |                          |                  |              |                              |                       |                                             |          |                      |                                      |               |                                       |               |
| 5       | M      | +                        | +                     | +                    |                        |                             |                       |                                |                          |                  |              | +                            | +                     |                                             |          |                      |                                      | R             |                                       |               |
| 6       | M      | +                        |                       |                      |                        | +                           | +                     |                                |                          |                  |              |                              | +                     |                                             |          |                      |                                      |               |                                       |               |
| 7       | F      | +                        | +                     | +                    |                        | +                           |                       | +                              |                          |                  |              | +                            | +                     |                                             |          |                      |                                      |               | +                                     |               |
| 8       | F      | +                        |                       |                      |                        |                             |                       |                                | +                        |                  |              |                              |                       |                                             |          |                      |                                      |               |                                       |               |
| 9       | M      | +                        | +                     |                      |                        | +                           | +                     |                                |                          |                  |              |                              | +                     |                                             |          |                      |                                      |               |                                       |               |
| 10      | F      | +                        | +                     | +                    | +                      | +                           |                       |                                |                          |                  |              |                              | +                     |                                             |          |                      |                                      |               |                                       |               |
| 11      | F      | +                        | +                     |                      |                        | +                           |                       |                                |                          |                  |              |                              |                       |                                             |          |                      |                                      |               |                                       |               |
| 12      | M      | +                        |                       |                      | +                      |                             |                       | +                              |                          |                  |              | +                            | +                     |                                             | +        |                      |                                      |               |                                       |               |
| 13      | F      | +                        |                       |                      | +                      |                             |                       |                                |                          |                  |              | +                            | +                     |                                             |          |                      |                                      |               | +                                     |               |
| 14      | F      | +                        | +                     |                      | +                      |                             | +                     |                                |                          |                  |              |                              | +                     |                                             |          |                      |                                      |               |                                       |               |
| 15      | M      |                          |                       |                      | +                      | +                           | +                     |                                | +                        |                  | +            |                              |                       |                                             |          |                      |                                      |               |                                       |               |
| 16      | M      | +                        | +                     |                      |                        | +                           | +                     |                                |                          | +                |              |                              | +                     |                                             |          |                      |                                      |               | +                                     |               |
| 17      | F      | +                        | +                     | +                    |                        |                             |                       |                                |                          |                  |              |                              |                       |                                             |          |                      |                                      |               |                                       |               |
| 18      | F      | +                        |                       |                      |                        |                             |                       |                                |                          |                  |              | +                            | +                     | +                                           |          |                      |                                      | B             |                                       |               |

Genomic findings in patients with clinical suspicion of 22q11.2 deletion syndrome.

Magdalena Koczkowska, Jolanta Wierzbna, Robert Smigiel, Maria Sasiadek, Magdalena Cabala, Ryszard Słężak, Mariola Iliszko, Iwona Kardas, Janusz Limon, Beata S. Lipska-Zietkiewicz.

|    |   |   |   |   |   |   |   |   |   |   |   |   |   |   |   |   |    |    |   |   |   |
|----|---|---|---|---|---|---|---|---|---|---|---|---|---|---|---|---|----|----|---|---|---|
| 19 | F | + | + |   |   | + | + |   |   |   |   |   |   | + |   |   |    |    |   |   |   |
| 20 | F | + |   |   |   | + |   | + |   | + |   | + |   |   |   |   |    |    |   |   |   |
| 21 | M | + | + | + |   | + | + |   | + | + |   |   | + |   |   |   |    |    |   |   |   |
| 22 | F | + | + |   |   |   |   | + |   |   |   |   | + |   |   | + |    |    | + |   |   |
| 23 | M | + | + |   | + |   |   |   |   |   |   |   | + | + |   |   |    |    |   | + |   |
| 24 | M | + | + |   |   |   |   |   |   |   |   |   |   | + |   |   | +  |    |   |   |   |
| 25 | F | + |   |   | + |   |   | + |   |   | + |   | + | + |   |   |    |    |   |   |   |
| 26 | M | + |   |   | + |   | + |   |   |   |   |   | + |   |   |   |    |    |   |   |   |
| 27 | M | + |   |   |   | + | + |   | + | + |   |   |   | + |   |   |    |    |   |   |   |
| 28 | F |   |   |   |   |   |   |   |   |   |   |   | + | + | + |   |    |    |   |   |   |
| 29 | F | + |   |   |   |   |   |   |   |   |   |   |   | + | + | + |    |    |   |   |   |
| 30 | F | + | + |   | + |   | + |   |   |   | + |   | + | + |   |   | nd |    |   |   |   |
| 31 | M | + | + | + |   | + |   |   |   |   |   |   |   |   |   |   |    |    |   |   |   |
| 32 | M | + |   |   | + |   | + |   |   |   |   |   |   | + |   |   |    |    |   |   |   |
| 33 | M | + | + |   |   | + | + |   |   |   |   |   |   |   |   |   | +  |    |   |   |   |
| 34 | M | + |   |   | + |   | + |   | + |   | + |   | + | + |   |   |    |    | B | + |   |
| 35 | F | + | + |   | + | + | + |   | + | + | + |   |   | + |   |   |    |    |   |   |   |
| 36 | M | + |   |   | + | + | + |   | + | + |   |   |   |   |   |   |    |    | L |   |   |
| 37 | M | + |   |   | + | + | + |   | + | + |   |   |   |   |   |   |    |    |   | + |   |
| 38 | F | + |   |   | + |   |   |   | + |   |   |   | + |   |   |   |    |    |   |   |   |
| 39 | M | + | + |   |   |   |   |   |   |   |   |   |   |   |   |   | nd | nd | + |   |   |
| 40 | F | + |   |   |   | + |   |   |   |   | + |   | + |   |   |   | nd | nd |   |   |   |
| 41 | F |   |   |   | + |   |   |   | + |   |   |   |   | + |   |   |    |    |   |   | + |

## Supplementary Data 2.

### Co-segregation of the unique 0.65Mb deletion at chromosome 3q26 in Family #41.

#### A. Family pedigree.

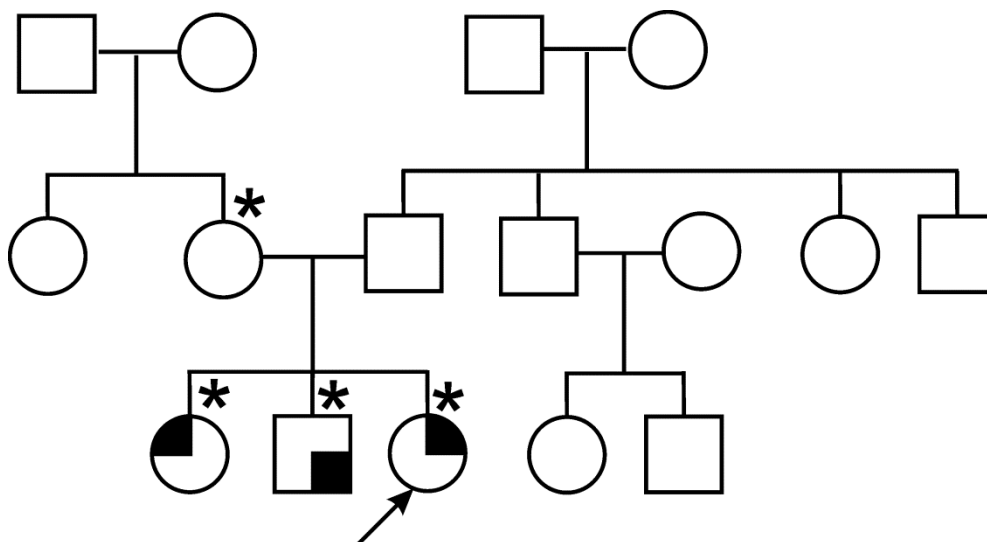

Legend:

\* - carriers of arr [hg18] 3q26.31(176,570,887-177,223,154)x1

#### B. Clinical data.

Affected family members:

Older sister (aged 17) – IUGR, bilateral cleft lip and cleft palate, short stature, congenital hypothyroidism, strabismus (exotropia), normal motor and psychosocial development, recurrent infections; dysmorphic features: long face, deep-set eyes, long nose with broad bridge, short philtrum, full triangle-shaped lips, long slender fingers of hands and feet.

Older brother (aged 16) – IUGR, hemodynamically significant congenital heart defect (VSD+PDA; surgical correction in infancy); normal motor and psychosocial development, dysmorphic features: long face, hypotelorism, long nose with broad bridge, short philtrum, small lips, long slender fingers of hands and feet.

Patient #41 (aged 8) – IUGR, no congenital defects, normal motor development, severe intellectual disability, autism spectrum disorder, dysmorphic features: long face, short palpebral fissures, long nose with broad bridge, short philtrum, micrognathia, long slender fingers of hands and feet.

Mother (aged 39) – no perinatal data, no congenital defects, normal motor and psychosocial development, dysmorphic features: long face, hypotelorism, long nose with broad bridge, short philtrum.

Ethnic background: The family is Kashubian, i.e. comes from a small inbred population of Pomerania region of Poland. Even though the parents negate being related, knowledge of the history of the region suggest relatively high possibility of consanguinity.
